# Supplementary material for: Hit-to-lead optimization of a benzene sulfonamide series for potential antileishmanial agents
Source: RSC Med Chem. 2020 Aug 25;11(11):1267–74. doi: 10.1039/d0md00165a (PMC8126888; doi:10.1039/d0md00165a)
Supplement: MD-011-D0MD00165A-s001 [file MD-011-D0MD00165A-s001.xlsx]

## Sheet: Full data csv file_JMK_Revised 
Structure	Compound ID	Batch IDs	Article_Compound_Number	Category	L. infantum MHOM/MA(BE)/67/ITMAP263 intracellular amastigotes IC50 (uM)	L. Inf. pIC50	LLE	LE	PMM IC50 (uM)	SI (vs PMM)	MLM CLint (uL/min/mg)	HLM CLint (uL/min/mg)	eLogD	L. donovani MHOM/ET/67/L82 intracellular amastigotes IC50 (uM)	L. infantum MHOM/MA/67/ITMAP263 intracellular amastigotes THP-1 cells IC50 (uM)	L. infantum MHOM/MA/67/ITMAP263 axenic Promastigotes IC50 (uM)	L. donovani MHOM/SD/62/1SCL2D axenic-cidal amastigotes IC50 (uM)	L. donovani MHOM/SD/62/1SCL2D intracellular amastigotes IC50 (uM)	T. cruzi Tulahuen C4 (LacZ) IC50 (uM)	MRC-5 CC50 (uM)	THP-1 CC50 (uM)	HFF-1 CC50 (uM)	HEPG2 CC50 (uM)	Vero IC50 (uM)	KS PBS - pH 2 (ug/mL)	KS PBS - pH7.4 (ug/mL)	PPB (%)	Media Binding (%)	PAMPA Pe (10-6 cm/s)	logS	logS @ pH7.4	logP	logD	MW	HBD	HBA	TPSA	Flexibility	Rotatable Bonds
CCCCCOc1c(S(NC2CCCC2)(=O)=O)cc(C)c(C)c1	DNDI0002550647	PCTCG03-0027		Initial Hit	1.05	5.98	0.91	0.36	45.25	43	416	567					12	13	7.86	37.01	>50		>50		0.74	0.56				1.78	1.78	5.07	5.07	339.5	1	4	55.4	0.33	8
CCCCCOc1c(S(NCc2sccc2)(=O)=O)cc(Cl)c(C)c1	DNDI0002572712	PCAXXAM01-100465 PCTCG03-0025		Initial Hit	0.85	6.07	0.87	0.35	40.32	48	693	693					4.4	12	12.23	44.11	>50		40		0.39	0.39				1.53	1.53	5.2	5.2	388	1	4	55.4	0.36	9
COc1c(C)cc(OC)c(S(N(Cc2ccccc2)Cc3ccccc3)(=O)=O)c1	DNDI0002644002	PCTCG04-0020		Initial Hit	0.54	6.27	2.8	0.3	>64	118	1075	920					1.5	12	>64	>64	>50		39		0.41	0.41				0.34	0.34	3.47	3.47	411.5	0	5	55.84	0.26	8
CCCOc1c(S(NC2CCCC2)(=O)=O)cc(C)c(C)c1	DNDI0002550535	PCAXXAM01-60499		Purchased	>32	4.49			>32	1				>32					>32	>32										2.29	2.29	4.3	4.3	311.4	1	4	55.4	0.27	6
CCCCOc1c(S(NCc2cnccc2)(=O)=O)cc(Cl)c(C)c1	DNDI0002558122	PCAXXAM01-43107		Purchased	16.59	4.78			>32	2				25.4					20.63	>32										1.94	1.94	3.6	3.6	368.9	1	5	68.29	0.32	8
COc1c(C)cc(OC)c(S(NCc2ccccc2)(=O)=O)c1	DNDI0002564850	PCAXXAM01-65296		Purchased	>32	4.49			>32	1				>32					>32	>32										2.7	2.7	3.28	3.28	321.4	1	5	64.63	0.26	6
CCCCCOc1c(S(NCc2ccco2)(=O)=O)cc(Cl)c(C)c1	DNDI0002567970	PCAXXAM01-66334		Purchased	1.08	5.97			>32	30				4.76			12	48	4.24	11.65	>50		>50							1.9	1.9	4.62	4.62	371.9	1	5	68.54	0.36	9
CCCOc1c(S(NCc2sccc2)(=O)=O)cc(Cl)c(C)c1	DNDI0002572626	PCAXXAM01-100443		Purchased	25.4	4.6			>32	1				>32					>32	>32										2.06	2.06	4.4	4.4	359.9	1	4	55.4	0.3	7
CCCCOc1c(S(NCc2sccc2)(=O)=O)cc(Cl)c(C)c1	DNDI0002620367	PCAXXAM01-99663		Purchased	0.79	6.1			>32	41				5.38			11	22	3.9	4.56	>50		>50							1.8	1.8	4.81	4.81	373.9	1	4	55.4	0.33	8
COc1c(C)cc(OC)c(S(NC(c2ccccc2)C)(=O)=O)c1	DNDI0002622495	PCAXXAM01-113650		Purchased	>32	4.49			>32	1				>32					>32	>32										2.52	2.52	3.71	3.71	335.4	1	5	64.63	0.25	6
CCCOc1c(S(NCC2OCCC2)(=O)=O)cc(C)c(C)c1	DNDI0002622936	PCAXXAM01-114092		Purchased	25.4	4.6			>32	1				>32					>32	>32										2.65	2.65	3.54	3.54	327.4	1	5	64.63	0.3	7
S(=O)(=O)(N(Cc1cccc(F)c1)c2ccc(c3c2)OCO3)c(ccc(n4c5)nn5)c4	DNDI0003321886	PCChemDiv01-12719		Purchased														>50			>50		>50	35						0.35	0.35	2.65	2.65	426.4	0	8	86.03	0.15	5
S(=O)(=O)(N(Cc1cccc(F)c1)c2ccc(c3c2)OCO3)c(ccc4n5c(C)nn4)c5	DNDI0003321887	PCChemDiv01-12720		Purchased													>30													0.1	0.1	2.98	2.98	440.5	0	8	86.03	0.14	5
S(=O)(=O)(N(Cc(cc1)ccc1OC)c2ccc(c3c2)OCO3)c(ccc(n4c5)nn5)c4	DNDI0003321888	PCChemDiv01-12717		Purchased														>50			>50		>50	>50						0.98	0.98	2.38	2.38	438.5	0	9	95.26	0.17	6
S(=O)(=O)(N(Cc1ccccc1F)c2ccc(c3c2)OCO3)c(ccc(n4c5)nn5)c4	DNDI0003321889	PCChemDiv01-12718		Purchased													>30													0.35	0.35	2.65	2.65	426.4	0	8	86.03	0.15	5
S(=O)(=O)(c1ccc(cc1)OC)N2Cc3c(CC2C(=O)NCc4ccccc4)cccc3	DNDI0003338988	PCChemDiv01-33119		Purchased														>50			>50		>50	29						0.77	0.77	3.07	3.07	436.5	1	6	75.71	0.21	7
S(=O)(=O)(c1ccc(c2c1)cccc2)N3CCn(c4C3c5ccc(cc5)OC)ccc4	DNDI0003355838	PCChemDiv01-55650		Purchased														>50			>50		>50	>50						-0.46	-0.46	3.7	3.7	418.5	0	5	51.54	0.12	4
S(=O)(=O)(N(Cc1ccccc1)CC(=O)N2CCN(C)CC2)c3c(OC)ccc(Cl)c3	DNDI0003363387	RCB001		Purchased	>32	4.49	2.34	0.21	>32	1									>32	>32										3.22	3.34	2.16	1.65	452	0	7	70.16	0.25	8
S(=O)(=O)(c1c(OC)ccc(OC)c1)N2CCCC2c3ccc(F)cc3	DNDI0003363388	RCB003		Purchased	9.59	5.02	2.36	0.28	>32	3									25.62	>32										1.11	1.11	2.65	2.65	365.4	0	5	55.84	0.19	5
S(=O)(=O)(N(Cc1ccccc1)CC(=O)N2CCCC2)c3c(OC)ccc(Cl)c3	DNDI0003363389	RCB004		Purchased	15.51	4.81	2.19	0.24	>32	2									>32	>32										2.33	2.33	2.62	2.62	422.9	0	6	66.92	0.27	8
CC(Nc1cc(C(NC(c2ccccc2)Cn3cncc3)=O)c(Cl)cc1)=O	DNDI0003363391	RCB005		Purchased	>55.43	4.26	1.36	0.22	>55.43	1									>55.43	>55.43										1.96	1.96	2.89	2.89	382.9	2	6	76.02	0.28	8
O=C(c1ccc(n2nnnc2)cc1)NC(c3ccccc3)Cn4cncc4	DNDI0003363392	RCB006		Purchased	>49.38	4.31	2.49	0.22	>55.43	1									9	>55.43										2.45	2.45	1.82	1.82	359.4	1	8	90.52	0.23	7
COc1ccc(C)cc1S(N(Cc2ccccc2)CC(N3CCOCC3)=O)(=O)=O	DNDI0003363393	RCB007		Purchased	18.93	4.72	2.71	0.23	>55.43	3									>55.43	>55.43										2.87	2.87	2.01	2.01	418.5	0	7	76.15	0.26	8
CCN(C(CN(S(c1ccc(OC)c(OC)c1)(=O)=O)Cc2ccccc2)=O)CC	DNDI0003363394	RCB008		Purchased	32.13	4.49	2.16	0.22	>55.43	2									>55.43	>55.43										2.72	2.72	2.33	2.33	420.5	0	7	76.15	0.37	11
COc1ccc(C)cc1S(N(Cc2ccccc2)CC(Nc3ccccc3)=O)(=O)=O	DNDI0003363395	RCB009		Purchased	>49.38	4.31	0.97	0.2	>55.43	1									19.77	>55.43										0.69	0.69	3.34	3.34	424.5	1	6	75.71	0.28	9
COc1ccc(C)cc1S(N(Cc2ccccc2)CC(NCc3ccc(Cl)cc3)=O)(=O)=O	DNDI0003363396	RCB010		Purchased	25.68	4.59	1.01	0.2	>55.43	2									6.02	>55.43										0.57	0.57	3.58	3.58	473	1	6	75.71	0.29	10
COc1ccc(C)cc1S(N(Cc2ccccc2)CC(=O)N)(=O)=O	DNDI0003363397	RCB011		Purchased	>55.43	4.26	2.24	0.25	>55.43	1									>55.43	>55.43										2.41	2.41	2.01	2.01	348.4	1	6	89.7	0.28	7
COc1ccc(OC)c(S(N2Cc3c(cccc3)CC2)(=O)=O)c1	DNDI0003363398	RCB012		Purchased	>55.43	4.26	2.09	0.26	>55.43	1									>55.43	>55.43										1.93	1.93	2.17	2.17	333.4	0	5	55.84	0.16	4
COc1ccc(C)cc1S(N(Cc2ccccc2)CC(=O)O)(=O)=O	DNDI0003363399	RCB013		Purchased	>55.43	4.26	1.59	0.25	>55.43	1									>55.43	>55.43										2.71	3.65	2.67	-0.21	349.4	1	6	83.91	0.28	7
COc1c(C)cc(S(N(Cc2ccccc2)CC(NC3CC3)=O)(=O)=O)cc1	DNDI0003363400	RCB014		Purchased	>49.38	4.31	1.57	0.22	>55.43	1									>55.43	>55.43										1.8	1.8	2.74	2.74	388.5	1	6	75.71	0.31	9
Clc1cc(S(NCc2ccccc2)(=O)=O)c(OCC(N3CCOCC3)=O)cc1	DNDI0003363401	RCB015		Purchased	>55.43	4.26	2.02	0.21	>55.43	1									>55.43	>55.43										3.22	3.22	2.24	2.24	424.9	1	7	84.94	0.27	8
COc1ccc(OC)c(S(n2c(c3ccccc3)nc(C)c2)(=O)=O)c1	DNDI0003363402	RCB016		Purchased	>55.43	4.26	1.57	0.24	>55.43	1									>55.43	>55.43										1.57	1.57	2.68	2.68	358.4	0	6	70.42	0.19	5
c1(cc(ccc1OC)Cl)S(=O)(=O)N(CC(=O)N2CCOCC2)Cc3ccccc3	SCYX0001379806	RCB002		Purchased	>32	4.49	2.42	0.22	>32	1									>32	>32										2.79	2.79	2.07	2.07	438.9	0	7	76.15	0.26	8
COc1ccccc1S(=O)(=O)N(Cc1ccccc1)Cc1ccccc1		Z45508946		Purchased	0.34	6.47			>32	94				1.59					3.77	>32
COc1ccc(OC)c(S(=O)(=O)N(Cc2ccccc2)Cc2ccccc2)c1		Z45508995		Purchased	1.01	6			>32	32				1.19					5.48	6.41
CCOC(=O)c1c(C)[nH]c(C(=O)Nc2ccc(Cl)c(S(=O)(=O)N3CCCCC3)c2)c1C		Z30461235		Purchased	2.99	5.52			16	5				3.39					1.06	2.17
COc1ccc(S(=O)(=O)N(Cc2ccccc2C#N)Cc2ccccc2C#N)cc1OC		Z220633250		Purchased	4.76	5.32			>32	7				>32					23.24	>32
COc1ccc(S(=O)(=O)N(Cc2cccc(F)c2)Cc2cccc(F)c2)cc1OC		Z220633200		Purchased	10.12	4.99			>32	3				25.4					4.38	>32
Cc1ccc(NC(=O)c2[nH]c(C)c(C(=O)OC(C)C)c2C)cc1S(=O)(=O)N1CCCCC1		Z51733284		Purchased	10.16	4.99			16	2				16.23					3.17	3.11
CCCc1c(C(=O)Nc2cccc(S(=O)(=O)NCc3ccco3)c2)[nH]c(C)c1C(C)=O		Z966334826		Purchased	14.49	4.84			>32	2				>32					8.32	12.78
Cc1ccc(NC(=O)CN(CC(C)C)c2cccc(O)c2)cc1S(=O)(=O)N(C)C		Z1317978681		Purchased	16.11	4.79			>32	2				19.03					14.81	28.37
CCN(CC)S(=O)(=O)c1cc(NC(=O)c2[nH]c(C)c(C(=O)OC)c2C)ccc1C		Z26467494		Purchased	16.11	4.79			>32	2				11.96					3.37	10.89
CCCCNS(=O)(=O)c1cccc(NC(=O)c2cc3ccccc3[nH]2)c1		Z88584859		Purchased	16.23	4.79			>32	2				25.4					>32	>32
Cc1ccc(NC(=O)CN2CCCCc3ccccc32)cc1S(=O)(=O)N1CCOCC1		Z1318043362		Purchased	16.59	4.78			16	1				25.4					14.09	>32
CCc1c(C(=O)Nc2cc(S(=O)(=O)NC)ccc2C)[nH]c(C)c1C(C)=O		Z792473370		Purchased	21.53	4.67			>32	1				>32					>32	>32
CN(Cc1ccccc1NCC(=O)Nc1cccc(S(=O)(=O)N(C)C)c1)C1CCCCC1		Z31013342		Purchased	21.53	4.67			>32	1				>32					14.92	>32
c1ccc(c(c1)NCc2c(cccc2Cl)F)-n3cccn3		Z739504072		Purchased	>32	4.49			>32	1				>32					14.99	>32
O=S(=O)(NCc1cccs1)c1ccc2c(c1)CCCC2		Z45423905		Purchased	>32	4.49			>32	1				>32					14.98	27.1
CCOC(=O)c1c(C)[nH]c(C(=O)Nc2cccc(S(=O)(=O)N3CCOCC3)c2)c1C		Z30001211		Purchased	>32	4.49			>32	1				>32					11.85	18.05
CNC(=O)NC(=O)COc1ccc(S(N)(=O)=O)cc1		Z381095182		Purchased	>32	4.49			>32	1				>32					>32	>32
CCOC(=O)c1c(C)[nH]c(C(=O)NNC(=O)c2cccc(S(=O)(=O)N(CC)CC)c2)c1C		Z30581529		Purchased	>32	4.49			>32	1				>32					>32	>32
CCCCNS(=O)(=O)c1cccc(NC(=O)c2ccc(C)c(OC)c2)c1		Z109591588		Purchased	>32	4.49			>32	1				>32					>32	>32
CCCCNS(=O)(=O)c1cccc(NC(=O)c2cc(C)c(C)s2)c1		Z88584860		Purchased	>32	4.49			>32	1				>32					>32	>32
CCOc1ccc(NC(=O)c2[nH]c(C)c(C(=O)OC)c2C)cc1S(=O)(=O)N1CCCC1		Z29178369		Purchased	>32	4.49			>32	1				>32					>32	>32
COc1ccc(S(=O)(=O)N(C)C)cc1NC(=O)Cn1c(=O)cnc2ccccc21		Z19025005		Purchased	>32	4.49			>32	1				>32					>32	>32
COC(=O)c1c(C)[nH]c(C(=O)Nc2cccc(S(C)(=O)=O)c2)c1C		Z109929482		Purchased	>32	4.49			>32	1				>32					>32	>32
COc1ccc(S(=O)(=O)N(C)C)cc1NC(=O)CN1C(=O)COc2ccccc21		Z29560624		Purchased	>32	4.49			>32	1				>32					>32	>32
CN(C)S(=O)(=O)c1cccc(NC(=O)CNc2cccc3c2CCCC3)c1		Z30985744		Purchased	>32	4.49			>32	1				>32					>32	>32
COc1c(NC(C2CCCc3c2cccc3)=O)cc(S(=O)(N(C)C)=O)cc1		Z300980532		Purchased	>32	4.49			>32	1				>32					16	>32
CCCCNS(=O)(=O)c1cccc(NC(=O)c2cnc(C)cn2)c1		Z88583029		Purchased	>32	4.49			>32	1				>32					22.63	>32
COC(=O)c1c(C)[nH]c(C(=O)Nc2cccc(S(=O)(=O)N3CCCC3)c2)c1C		Z30224758		Purchased	>32	4.49			>32	1				>32					>32	>32
CC1Cc2c(N1CC(Nc3cc(S(=O)(N(C)C)=O)c(Cl)cc3)=O)cccc2		Z30956600		Purchased	>32	4.49			>32	1				>32					>32	>32
COC(=O)c1cccc(C(=O)Nc2cccc(S(=O)(=O)N3CCCC3)c2)n1		Z441654950		Purchased	>32	4.49			>32	1				>32					>32	>32
CC1CCc2c(N1CC(Nc3cc(S(=O)(N(C)C)=O)c(Cl)cc3)=O)cccc2		Z46500410		Purchased	>32	4.49			>32	1				>32					>32	>32
CC1CCc2c(N1CC(N3CCCc4c3ccc(S(=O)(N(C)C)=O)c4)=O)cccc2		Z195652240		Purchased	>32	4.49			>32	1				>32					26.71	>32
CN(C)S(=O)(=O)c1cccc(NC(=O)CN2CCCc3cc(F)cc(F)c32)c1		Z369155588		Purchased	>32	4.49			>32	1				>32					>32	>32
CCc1c(C(=O)N2CCc3ccc(S(=O)(=O)NC)cc32)[nH]c(C)c1C(C)=O		Z1262206860		Purchased	>32	4.49			>32	1				>32					>32	>32
COc1ccc(S(=O)(N(C)C)=O)cc1NC(C2Cc3ccccc3O2)=O		Z109062150		Purchased	>32	4.49			>32	1				>32					17.62	>32
COc1ccc(S(=O)(=O)N(C)C)cc1NC(=O)Cn1c(=O)oc2ccccc21		Z15399918		Purchased	>32	4.49			>32	1				>32					>32	>32
CCN(CC)S(=O)(=O)c1ccc(OC)c(NC(=O)CNc2cccc3c2CCCC3)c1		Z133511332		Purchased	>32	4.49			>32	1				>32					>32	>32
CN(C)S(=O)(=O)c1cccc(NC(=O)CN2CCCc3ccccc32)c1		Z46159369		Purchased	>32	4.49			>32	1				>32					>32	>32
COc1ccc(S(=O)(=O)N(C)C)cc1NC(=O)Cn1c(C)cc2ccccc21		Z109062140		Purchased	>32	4.49			>32	1				>32					>32	>32
CCN(CC)S(=O)(=O)c1ccc(OC)c(NC(=O)CN(C)c2ccccc2)c1		Z46175669		Purchased	>32	4.49			>32	1				>32					17.72	>32
CC1=CC(OC)=C(S(N(CC)CC2=CC=CC=C2)(=O)=O)C=C1OC		Z2235810678		Purchased	1.08	5.97			>32	30				6.35					15.73	>32
CC1=CC(OC)=C(S(N(CC2)CCN2CC3=CC=CC=C3)(=O)=O)C=C1OC		Z1532943652		Purchased	>32	4.49			>32	1				>32					>32	>32
CC1=CC(OC)=C(S(NC2CCCCC2)(=O)=O)C=C1C		Z1542834122		Purchased	>32	4.49			>32	1				>32					>32	>32
CC1=CC(OCC)=C(S(N(CC2=CC=CC=C2)CC3=CC=CC=C3)(=O)=O)C=C1OCC		Z1198037468		Purchased	0.87	6.06			>32	37				25.4					4.92	>32
CC1=CC(OCC)=C(S(NC(C)C2=CC=CC=C2)(=O)=O)C=C1OC		Z1184857765		Purchased	>32	4.49			>32	1				>32					>32	>32
CC1=CC(OCC)=C(S(NCC2=CC=CC=C2)(=O)=O)C=C1OC		Z1345959560		Purchased	>32	4.49			>32	1				>32					>32	>32
CC1=CC(OCCC)=C(S(NC2CCCC2)(=O)=O)C=C1C		Z1197866122		Purchased	>32	4.49			>32	1				>32					>32	>32
CC1=CC(OCCC)=C(S(NC2CCCCC2)(=O)=O)C=C1C		Z1198524053		Purchased	5.38	5.27			>32	6				>32					28.04	>32
CC1=CC(OCCCC)=C(S(NC2CCCCC2)(=O)=O)C=C1C(C)C		Z1346174753		Purchased	1.01	6			16	16				3.39					3.93	3.74
CC1=CC(OCCCC)=C(S(NCC2=CC=CS2)(=O)=O)C=C1Cl		Z1198037505		Purchased	0.79	6.1			>32	41				5.38					3.9	4.56
CC1=CC(OCCCC)=C(S(NCC2=CN=CC=C2)(=O)=O)C=C1Cl		Z969575790		Purchased	16.59	4.78			>32	2				25.4					20.63	>32
CC1=CC(OCCCCC)=C(S(N)(=O)=O)C=C1Cl		Z1724003560		Purchased	>32	4.49			>32	1				>32					>32	>32
CC1=CC(OCCCCC)=C(S(NC2CC(C)(C)NC(C)(C)C2)(=O)=O)C=C1C		Z2035103903		Purchased	4.76	5.32			>32	7				16.23					11.99	10.89
CC1=CC(OCCCCC)=C(S(NC2CCCCC2)(=O)=O)C=C1C		Z1201712752		Purchased	1.04	5.98			>32	31				4.32					3.7	26.06
CC1=CC(OCCCCC)=C(S(NCC2=CC=CO2)(=O)=O)C=C1Cl		Z1172171148		Purchased	1.08	5.97			>32	30				4.76					4.24	11.65
FC1=CC(S(N2CC(C3=CC=C(N=CC=N4)C4=C3)C(C5=CSC=C5)=N2)(=O)=O)=CC=C1		Z1954757677		Purchased	>32	4.49			>32	1				>32					>32	>32
CCN(S(c1c(C#N)cccc1)(=O)=O)Cc2ccccc2	DNDI0002574585	MAD1607		Synthesised	25.61	4.59	2	0.31	>64	2	1060	306	3.5						29.3	>64									16.6	1.05	1.05	2.59	2.59	300.4	0	4	61.17	0.27	6
COc1ccc(OC)c(S(=O)(=O)N(Cc2ccccc2)Cc3ccccc3)c1	DNDI0003292440	MAD1631	9	Synthesised	0.36	6.43	3.32	0.33	>64	292	1300	242	4.6						5.71	45.25									0.43	0.62	0.62	3.11	3.11	397.5	0	5	55.84	0.27	8
Cc1ccc(S(=O)(N(CC)Cc2ccccc2)=O)cc1	DNDI0003297129	MAD1522		Synthesised	49.35	4.31	1.22	0.3	>64	1		1744	4.1						28.78	>64									5.38	1.68	1.68	3.09	3.09	289.4	0	3	37.38	0.24	5
O=S(=O)(N(CC)Cc1ccccc1)c2ccc(OC)cc2	DNDI0003297130	MAD1528		Synthesised	10.99	4.96	2.34	0.33	>64	6	3012	676	3.9						18.54	>64									7.68	2.08	2.08	2.62	2.62	305.4	0	4	46.61	0.27	6
N#Cc1c(C)cc(C)nc1SCSc2c(C#N)c(C)cc(C)n2	DNDI0003297456	MAD1530_S		Synthesised	>64	4.19	0.59	0.26	>64	1									>64	>64										0.46	0.46	3.6	3.6	340.5	0	4	73.36	0.25	6
N#Cc1c(C)cc(C)nc1SC(Cc2ccccc2)CC	DNDI0003297457	MAD1536		Synthesised	2.64	5.58	0.76	0.37	40.32	15	1895	2006	5.4						6.9	>64									0.19	0.3	0.3	4.82	4.82	296.4	0	2	36.68	0.27	6
N#Cc1c(C)cc(C)nc1S(=O)C(Cc2ccccc2)CC	DNDI0003297458	MAD1539		Synthesised	47.55	4.32	0.53	0.28	>64	1	1556	1234	3.2						>64	>64									13.4	0.8	0.8	3.79	3.79	312.4	0	3	53.75	0.26	6
O=S(=O)(C(Cc1ccccc1)CC)c2nc(C)cc(C)c2C#N	DNDI0003297459	MAD1540		Synthesised	20.23	4.69	1.61	0.29	>64	3									45.25	>64										0.78	0.78	3.09	3.09	328.4	0	4	70.82	0.25	6
CC[C@@H]([S](=O)c1c(OC)cccc1)Cc2ccccc2	DNDI0003362001	MAD1563_ap		Synthesised	52.5	4.28	0.14	0.3	>64	1	3623	390	3.7						31.52	>64									9.42	1.3	1.3	4.14	4.14	288.4	0	2	26.3	0.29	6
O=[S](c1ccccc1OC)[C@@H](Cc2ccccc2)CC	DNDI0003362002	MAD1563_p		Synthesised	35.29	4.45	0.32	0.31	>64	2	3623	390	3.7						30.81	>64									9.42	1.3	1.3	4.14	4.14	288.4	0	2	26.3	0.29	6
CC[C@@H](S(=O)(=O)c1ccccc1OC)Cc2ccccc2	DNDI0003362003	MAD1564		Synthesised	34.56	4.46	1.02	0.3	>64	2	1060	458	3.5						31.72	>64									19.8	1.39	1.39	3.44	3.44	304.4	0	3	43.37	0.27	6
O=C(CCCC)Nc1c(S(CCOc2ccccc2)(=O)=O)nccc1	DNDI0003363560	MAD1590		Synthesised	32.46	4.49	2.05	0.25	32	1									14.73	29.68										1.25	1.25	2.44	2.44	362.5	1	6	85.36	0.38	10
O=C(CCCC)Nc1c(S(CCc2ccccc2)(=O)=O)nccc1	DNDI0003363561	MAD1596		Synthesised	>64	4.19	1.57	0.24	>64	1			3.9						>64	>64									18.9	1.52	1.52	2.62	2.62	346.5	1	5	76.13	0.36	9
O=S(NCc1ccccc1)(c2ccccc2)=O	DNDI0003363562	MAD1598		Synthesised	>64	4.19	1.53	0.35	>64	1	161	50	2.9						>64	>64									21.6	2.83	2.83	2.67	2.67	247.3	1	3	46.17	0.22	4
O=S(N(CC)Cc1ccccc1)(c2ccccc2)=O	DNDI0003363563	MAD1599		Synthesised	>64	4.19	1.5	0.31	>64	1	1185	418	3.8						32.13	>64									7.54	2.01	2.01	2.7	2.7	275.4	0	3	37.38	0.25	5
CCN(Cc1ccccc1)S(c2c(OC)cccc2)(=O)=O	DNDI0003363820	MAD1600		Synthesised	10.99	4.96	2.31	0.33	>64	6	1368	406	3.6						30.13	36.3									18.5	1.84	1.84	2.65	2.65	305.4	0	4	46.61	0.27	6
O=S(N(CCOC)Cc1ccccc1)(c2ccccc2)=O	DNDI0003363821	MAD1601		Synthesised	40.48	4.39	1.95	0.29	>64	2	2986	239	3.5						39.3	>64									25.3	2.46	2.46	2.45	2.45	305.4	0	4	46.61	0.32	7
CCN(Cc1ccccc1)S(c2c(OC)ccc(Cl)c2)(=O)=O	DNDI0003364251	MAD1608		Synthesised	5.52	5.26	2.24	0.33	>64	12	1263	304	4.3						9.1	53.2									3.74	2.02	2.02	3.02	3.02	339.8	0	4	46.61	0.26	6
CCN(Cc1ccccc1)S(c2c(OC(F)(F)F)cccc2)(=O)=O	DNDI0003364252	MAD1609		Synthesised	8.47	5.07	1.7	0.3	>64	8	2344	1182	4.5						22.38	>64									1.18	1.07	1.07	3.37	3.37	359.4	0	4	46.61	0.28	7
CCN(Cc1ccccc1)S(c2ccc(NC(C)=O)cc2)(=O)=O	DNDI0003364473	MAD1610		Synthesised	>64	4.19	1.77	0.26	>64	1	398	205	3.5						33.11	>64									13.6	2.3	2.3	2.42	2.42	332.4	1	5	66.48	0.29	7
CCN(Cc1ccccc1)S(c2cc(F)ccc2F)(=O)=O	DNDI0003364474	MAD1611		Synthesised	33.91	4.47	1.47	0.3	>64	2	705	205	4.2						30.13	45.25										1.01	1.01	3	3	311.4	0	3	37.38	0.23	5
[H]N(OC)S(c1c(OC)ccc(Cl)c1)(=O)=O	DNDI0003364475	MAD1612		Synthesised	>64	4.19	2.68	0.37	>64	1									>64	>64										3.97	3.97	1.51	1.51	251.7	1	5	64.63	0.27	4
O=S(N(OC)Cc1ccccc1)(c2c(OC)ccc(Cl)c2)=O	DNDI0003364476	MAD1613		Synthesised	24.67	4.61	2	0.29	>64	3	1890	265	4.3						7.86	>64									5.91	1.67	1.67	2.6	2.6	341.8	0	5	55.84	0.26	6
CCN(Cc1ccccc1)S(c2c(N3CCCC3)ccc(F)c2)(=O)=O	DNDI0003364614	MAD1617		Synthesised	12.94	4.89	1.53	0.27	50.8	4	3002	1469	4.9						7.33	>64									0.34	0.95	1.7	3.35	2.58	362.5	0	4	40.62	0.22	6
CCN(Cc1ccccc1)S(c2c(Br)cccc2)(=O)=O	DNDI0003365405	MAD1627		Synthesised	33.87	4.47	1.17	0.31	>64	2	235	88	4.2						13.77	>64										1.21	1.21	3.3	3.3	354.3	0	3	37.38	0.24	5
[H]N(Cc1ccccc1)S(c2c(F)ccc(F)c2)(=O)=O	DNDI0003365406	MAD1628		Synthesised	49.35	4.31	1.43	0.3	>64	1	260	75	3.2						>64	>64									30.4	1.98	1.98	2.88	2.88	283.3	1	3	46.17	0.2	4
CCN(Cc1ccccc1)S(c2c(OC)ccc(OC)c2)(=O)=O	DNDI0003365407	MAD1629	38	Synthesised	2.53	5.6	3.17	0.34	>64	25	3497	534	3.8						27.45	>64									11.9	1.99	1.99	2.43	2.43	335.4	0	5	55.84	0.29	7
[H]N(Cc1ccccc1)S(c2c(OC)ccc(OC)c2)(=O)=O	DNDI0003365408	MAD1630		Synthesised	>64	4.19	1.34	0.27	>64	1	1253	126	2.8						>64	>64									16.8	2.91	2.91	2.85	2.85	307.4	1	5	64.63	0.27	6
O=S(N(Cc1ccccc1)CCOC)(c2c(OC)ccc(OC)c2)=O	DNDI0003365566	MAD1632	39	Synthesised	2.07	5.68	3.55	0.32	>64	31		253	3.5						32.82	39.4										2.54	2.54	2.13	2.13	365.5	0	6	65.07	0.35	9
Clc1cc(S(N(CC)Cc2ccc(F)cc2)(=O)=O)c(OC)cc1	DNDI0003366065	PJK531		Synthesised	21.98	4.66	1.52	0.28	>64	3		352	4.4						6.88	59.5										1.21	1.21	3.14	3.14	357.8	0	4	46.61	0.25	6
CN(Cc1ccc(F)cc1)S(c2c(OC)ccc(OC)c2)(=O)=O	DNDI0003366066	PJK533	37	Synthesised	11.7	4.93	2.83	0.3	>64	5		414	3.7						26.74	>64										1.74	1.74	2.1	2.1	339.4	0	5	55.84	0.25	6
OCCN(Cc1ccccc1)S(c2c(OC)ccc(OC)c2)(=O)=O	DNDI0003366067	PJK534		Synthesised	52.5	4.28	2.5	0.25	>64	1		161	2.9						51.17	>64										2.99	2.99	1.78	1.78	351.4	1	6	76.07	0.32	8
Clc1cc(S(N(CCO)Cc2ccccc2)(=O)=O)c(OC)cc1	DNDI0003366068	MAD1662 PJK535		Synthesised	37.51	4.43	2.06	0.27	>64	2		180	3.5						26.84	>64									20.15	2.91	2.91	2.37	2.37	355.8	1	5	66.84	0.29	7
Fc1ccc(CN(Cc2ccc(F)cc2)S(c3c(OC)ccc(OC)c3)(=O)=O)cc1	DNDI0003366069	PJK536	32	Synthesised	0.54	6.27	2.93	0.29	>64	119			4.7						6.35	>64										-0.21	-0.21	3.34	3.34	433.5	0	5	55.84	0.25	8
Fc1cc(S(N(CC)Cc2ccccc2)(=O)=O)c(OC)cc1	DNDI0003366070	PJK540		Synthesised	10.99	4.96	2.21	0.32	>64	6		383	3.9						28.36	49.57										1.54	1.54	2.75	2.75	323.4	0	4	46.61	0.26	6
Fc1cc(S(N(Cc2ccccc2)Cc3ccccc3)(=O)=O)c(OC)cc1	DNDI0003366071	PJK542	18	Synthesised	1.37	5.86	2.44	0.3	>64	47		955	4.7						6.82	>64										0.21	0.21	3.42	3.42	385.5	0	4	46.61	0.24	7
Clc1cc(S(N(Cc2ccccc2)Cc3ccccc3)(=O)=O)c(OC)cc1	DNDI0003366072	PJK543	19	Synthesised	1.37	5.86	2.16	0.3	>64	47	1352	407	5						8.16	>64										0.5	0.5	3.7	3.7	401.9	0	4	46.61	0.24	7
FC(Oc1ccccc1S(N(Cc2ccccc2)Cc3ccccc3)(=O)=O)(F)F	DNDI0003366074	PJK544	15	Synthesised	1.08	5.97	1.95	0.29	32	30	689	93	5.1						6.3	>64										-0.01	-0.01	4.02	4.02	421.4	0	4	46.61	0.26	8
[H]N(CCN(C)C)S(c1c(OC)ccc(Cl)c1)(=O)=O	DNDI0003366089	MAD1633		Synthesised	>64	4.19	2.3	0.31	>64	1		33	2.1						>64	>64										4.53	3.28	1.89	-0.06	292.8	1	5	58.64	0.33	6
O=S(N(CCN(C)C)Cc1ccccc1)(c2c(OC)ccc(Cl)c2)=O	DNDI0003366090	MAD1638 MAD1638_oxal		Synthesised	6.14	5.21	2.29	0.29	45.25	7	120	1187	4						32.72	26.71										2.96	3	2.92	1.65	382.9	0	5	49.85	0.31	8
O=S(N(CCN(C)C)Cc1ccccc1)(c2ccc(NC(C)=O)cc2)=O	DNDI0003366091	MAD1640_oxal MAD1640		Synthesised	>64	4.19	1.9	0.23	>64	1	42	95	3						>64	>64										3.32	3.12	2.3	0.68	375.5	1	6	69.72	0.33	9
[H]N(Cc1ccccc1)S(c2ccc(NC(C)=O)cc2)(=O)=O	DNDI0003366092	MAD1641		Synthesised	>64	4.19	2.15	0.27	>64	1									>64	>64										2.96	2.96	2.05	2.05	304.4	2	5	75.27	0.27	6
COc1c(S(=O)(N(C2CCNCC2)Cc3ccccc3)=O)cc(OC)cc1	DNDI0003366094	PJK552		Synthesised	27.84	4.56	2.31	0.24	45.25	2	23	100	3.1						28.88	42.23										2.89	3.1	2.24	1.12	390.5	1	6	67.87	0.24	7
COc1c(S(=O)(N(CC)Cc2ccccn2)=O)cc(OC)cc1	DNDI0003366095	PJK555		Synthesised	44.15	4.36	2.48	0.27	>64	1	2192	118	2.7						>64	>64										2.52	2.52	1.87	1.87	336.4	0	6	68.73	0.29	7
O=S(N(CCOC)Cc1ccccc1)(c2ccc(NC(C)=O)cc2)=O	DNDI0003366100	MAD1642_p		Synthesised	>64	4.19	2.06	0.23	>64	1	29	424	3.2						>64	>64										2.65	2.65	2.13	2.13	362.5	1	6	75.71	0.35	9
O=S(N(CCOC)Cc1ccccc1)(c2ccc(N(CCOC)C(C)=O)cc2)=O	DNDI0003366101	MAD1642_ap		Synthesised	>64	4.19	2.33	0.2	>64	1	227	73	3.1						>64	>64										3.29	3.29	1.87	1.87	420.5	0	7	76.15	0.4	12
O=S(N(CCOC)Cc1ccccc1)(c2ccc(NCCOC)cc2)=O	DNDI0003366102	MAD1642_H		Synthesised	38.58	4.41	2.24	0.24	>64	2									34.78	38.06										2.66	2.35	2.17	1.23	378.5	1	6	67.87	0.41	11
COc1cc(S(N(Cc2ccccc2)C3CCCNC3)(=O)=O)c(OC)cc1	DNDI0003366131	PJK557		Synthesised	29.54	4.53	2.11	0.23	>64	2	96	347	3.2						31.6	58.47										2.88	2.95	2.42	1.19	390.5	1	6	67.87	0.24	7
CC(N1CCC(N(Cc2ccccc2)S(c3c(OC)ccc(OC)c3)(=O)=O)CC1)=O	DNDI0003366132	PJK559		Synthesised	>64	4.19	2.35	0.2	>64	1			3.1						>64	>64										2.33	2.33	1.84	1.84	432.5	0	7	76.15	0.25	8
NC(c1cc(S(=O)(N(Cc2ccccc2)Cc3ccccc3)=O)c(OC)cc1)=O	DNDI0003366135	PJK569	21	Synthesised	7.39	5.13	2.57	0.25	>64	9	1670	108	3.6						>64	43.22										0.95	0.95	2.56	2.56	410.5	1	6	89.7	0.26	8
COc1c(S(=O)(N(Cc2ccccc2)Cc3ccccc3)=O)cc(C#N)cc1	DNDI0003366138	PJK576	17	Synthesised	0.44	6.36	3.26	0.32	>64	147		304	4.3						8.16	40.42									3.93	-0.22	-0.22	3.1	3.1	392.5	0	5	70.4	0.27	8
O=S(N(CCN(C)C)Cc1ccccc1)(c2c(S(=O)(C)=O)cccc2)=O	DNDI0003367255	MAD1651		Synthesised	>64	4.19	2.08	0.23	>64	1			2.6						>64	>64									2.04	3.36	3.53	2.11	0.45	396.5	0	6	74.76	0.3	8
O=S(N(CCN(C)C)Cc1ccccc1)(c2c(OC(F)(F)F)cccc2)=O	DNDI0003367256	MAD1652		Synthesised	8.64	5.06	1.83	0.26	45.25	5									32.05	53.37										2.58	2.64	3.24	2.26	402.4	0	5	49.85	0.32	9
COc1c(S(=O)(N(C2CCCN(C(C)=O)C2)Cc3ccccc3)=O)cc(OC)cc1	DNDI0003367307	PJK581		Synthesised	>64	4.19	2.02	0.2	>64	1			3.3						54.31	>64									16.4	2.61	2.61	2.17	2.17	432.5	0	7	76.15	0.25	8
COc1c(S(=O)(N(CCn2c(C)cc(C)n2)Cc3ccccc3)=O)cc(OC)cc1	DNDI0003367308	PJK584		Synthesised	6.23	5.21	1.97	0.24	>64	10	3101	2268	4.1						8.09	51									10.9	1.12	1.12	3.23	3.23	429.5	0	7	73.66	0.28	9
O=S(c1ccc(OC)cc1)(N(Cc2ccccc2)Cc3ccccc3)=O	DNDI0003367309	PJK589	11	Synthesised	45.41	4.34	1.04	0.23	>64	1	2412	184	4.7						>64	>64									1	0.63	0.63	3.31	3.31	367.5	0	4	46.61	0.25	7
OC(c1cc(S(=O)(N(Cc2ccccc2)Cc3ccccc3)=O)c(OC)cc1)=O	DNDI0003368287	PJK607	20	Synthesised	57.02	4.24	1.05	0.2	>64	1		23	2.5						>64	>64									17.8	1.37	3.22	3.19	0.82	411.5	1	6	83.91	0.26	8
O=S(N(CCO)Cc1ccccc1)(c2cc(F)ccc2F)=O	DNDI0003368289	MAD1656		Synthesised	>64	4.19	1.85	0.27	>64	1		23	3.2						47.25	>64									15.7	1.73	1.73	2.35	2.35	327.4	1	4	57.61	0.26	6
O=S(N(CCN(C)C)Cc1ccccc1)(c2ccc(N)cc2)=O	DNDI0003368290	MAD1657		Synthesised	>64	4.19	1.92	0.26	>64	1		56	2.5						>64	>64									0.88	3.23	2.96	2.28	0.58	333.5	1	5	66.64	0.29	7
O=S(N(CCN(C)C)Cc1ccccc1)(c2ccc(N3C(=O)CCC3=O)cc2)=O	DNDI0003368291	MAD1658		Synthesised	>64	4.19	1.87	0.2	>64	1		23	2.5						>64	>64									1.64	2.75	3.24	2.33	0.05	415.5	0	7	78	0.26	8
Fc1ccc(OCCN(Cc2ccccc2)S3(=O)=O)c3c1	DNDI0003368292	MAD1659		Synthesised	>64	4.19	1.64	0.28	>64	1									48.9	>64										1.47	1.47	2.55	2.55	307.3	0	4	46.61	0.09	2
O=S(N(CCN(C)C)Cc1ccccc1)(c2ccc(NC(CCCO)=O)cc2)=O	DNDI0003368293	MAD1663_B		Synthesised	>64	4.19	2.06	0.2	>64	1		23	2.9						>64	>64									0.21	3.48	3.22	2.13	0.26	419.5	2	7	89.95	0.4	12
COc1cc(S(=O)(N(CCN2CCOCC2)Cc3ccccc3)=O)c(OC)cc1	DNDI0003368294	PJK593		Synthesised	9.06	5.04	2.78	0.24	>64	7		227	3.4						>64	>64									5.27	2.77	3.03	2.27	1.72	420.5	0	7	68.31	0.29	9
COc1cc(S(=O)(N(Cc2nc(C)no2)Cc3ccc(F)cc3)=O)c(OC)cc1	DNDI0003368295	PJK606	36	Synthesised	7.75	5.11	2.53	0.25	>64	8		350	3.5						30.04	>64									8.92	1.19	1.19	2.58	2.58	421.4	0	8	94.76	0.26	8
COc1c(S(=O)(N(Cc2ccccc2)Cc3ccccc3)=O)cc(C(N4CCOCC4)=O)cc1	DNDI0003368296	PJK610	22	Synthesised	0.46	6.34	3.86	0.26	45.25	99		810	3.8						>64	>64									6.19	1.42	1.42	2.48	2.48	480.6	0	7	76.15	0.24	9
COc1c(S(=O)(N(Cc2ccccc2)Cc3ccccc3)=O)cc(C(N4CCCC4)=O)cc1	DNDI0003368297	PJK611		Synthesised	0.48	6.31	3.41	0.27	32	66		796	4.1						>64	>64									4.91	0.77	0.77	2.91	2.91	464.6	0	6	66.92	0.25	9
COc1c(S(=O)(N(Cc2ccccc2)Cc3ccccc3)=O)cc(C(NC)=O)cc1	DNDI0003368298	PJK612		Synthesised	0.71	6.15	3.61	0.29	50.8	72		316	3.8						>64	4.87									10.4	1.13	1.13	2.54	2.54	424.5	1	6	75.71	0.28	9
COc1c(S(=O)(N(Cc2ccccc2)Cc3ccccc3)=O)cccn1	DNDI0003368299	PJK624	30	Synthesised	0.64	6.19	3.55	0.33	>64	100		849	4.3						6.34	3.81									2.05	1.13	1.13	2.64	2.64	368.5	0	5	59.5	0.25	7
COc1ccc(OC)c(S(=O)(N(Cc2ccc(F)cc2)Cc3ncccc3)=O)c1	DNDI0003368394	PJK637		Synthesised	0.97	6.01	3.35	0.29	>64	66	344	151	2.7						20.86	>64									60.14	0.57	0.57	2.67	2.67	416.5	0	6	68.73	0.26	8
O=S(c1c(OC)ccc(C#N)c1)(N(CCOC)Cc2ccc(F)cc2)=O	DNDI0003368395	PJK638	41	Synthesised	8.88	5.05	2.81	0.27	>64	7		23	3.4						>64	>64									15.3	1.49	1.49	2.24	2.24	378.4	0	6	79.63	0.33	9
CCCCOc1c(S(=O)(NCc2ccc(F)cc2)=O)cccn1	DNDI0003368396	PJK640		Synthesised	8.73	5.06	2.53	0.31	>64	7		1651	3.8						29.55	>64									14.9	2	2	2.52	2.52	338.4	1	5	68.29	0.33	8
	DNDI0003368458	MAD1663_A		Synthesised	>64	4.19			>64	1									27.27	>64
O=S(N([H])C(CO)Cc1ccccc1)(c2c(F)ccc(F)c2)=O	DNDI0003368459	MAD1673		Synthesised	>64	4.19	1.58	0.26	>64	1	274	42	2.8						>64	>64									10.6	1.99	1.99	2.62	2.62	327.4	2	4	66.4	0.26	6
Fc1ccc(OCC(Cc2ccccc2)NS3(=O)=O)c3c1	DNDI0003368460	MAD1676		Synthesised	>64	4.19	1.51	0.28	>64	1			3.3						>64	>64									26.2	1.1	1.1	2.68	2.68	307.3	1	4	55.4	0.09	2
O=S(N([H])C(C(OC)=O)Cc1ccccc1)(c2c(Br)cccc2)=O	DNDI0003369003	MAD1674_F3		Synthesised	>64	4.19	0.52	0.24	>64	1			3.4						57.97	>64									20.4	1.91	1.91	3.68	3.68	398.3	1	5	72.47	0.29	7
O=S(N([C@H](C(OC)=O)CO)[H])(c1c(OC)ccc(Cl)c1)=O	DNDI0003369004	MAD1678		Synthesised	>64	4.19	2.76	0.28	>64	1	230	112	1.8						>64	>64									9.07	4.55	4.55	1.44	1.44	323.8	2	7	101.9	0.35	7
CCOCCOc1c(S(=O)(NCc2ccc(F)cc2)=O)cccn1	DNDI0003369119	PJK641		Synthesised	33.26	4.48	2.64	0.26	>64	2	1530	2210	3.2						>64	>64									23.8	2.4	2.4	1.84	1.84	354.4	1	6	77.52	0.36	9
O=S(c1c(OCc2ccccc2)nccc1)(NCc3ccc(F)cc3)=O	DNDI0003369120	PJK643		Synthesised	8.42	5.07	2.3	0.27	32	4	2750	2740	4						12.7	20.16									12.8	1.16	1.16	2.78	2.78	372.4	1	5	68.29	0.25	7
O=S(c1c(NCCN2CCOCC2)nccc1)(NCc3ccc(F)cc3)=O	DNDI0003369121	PJK647		Synthesised	>64	4.19	2.95	0.22	>64	1	1950	1850	3.1						>64	>64									1.85	2.93	1.78	1.24	1.33	394.5	2	7	83.56	0.28	8
COc1c(S(=O)(N(Cc2ccc(F)cc2)Cc3ccc(F)cc3)=O)cc(Br)cn1	DNDI0003369122	PJK656		Synthesised	14.76	4.83	1.38	0.23	>64	4	469	95	5.2						7.43	>64										-0.51	-0.51	3.45	3.45	483.3	0	5	59.5	0.23	7
COc1c(S(=O)(N(Cc2ccc(F)cc2)Cc3ccc(F)cc3)=O)cc(C#N)cn1	DNDI0003369123	PJK657		Synthesised	7.6	5.12	2.39	0.24	>64	8			4.5						8.4	>64										-0.23	-0.23	2.72	2.72	429.4	0	6	83.29	0.25	8
O=S(N(Cc1ccccc1)C(CO)CO)(c2c(F)ccc(F)c2)=O	DNDI0003369448	MAD1686		Synthesised	57.02	4.24	2.36	0.25	>64	1	97	23	2.9						31.58	>64									11.2	2.02	2.02	1.88	1.88	357.4	2	5	77.84	0.28	7
O=S(N([H])C(CO)Cc1ccccc1)(c2c(Br)cccc2)=O	DNDI0003369449	MAD1687		Synthesised	>64	4.19	1.1	0.27	>64	1	1370	244	3						33.4	>64									17.4	2.29	2.29	3.1	3.1	370.3	2	4	66.4	0.27	6
O=S(N(C(CO)Cc1ccccc1)Cc2ccccc2)(c3c(Br)cccc3)=O	DNDI0003369450	MAD1689		Synthesised	>64	4.19	0.29	0.21	>64	1	2180	1560	4.6						5.54	21.33									2.82	0.24	0.24	3.91	3.91	460.4	1	4	57.61	0.27	8
Fc1ccc(OCC(COC)N(Cc2ccccc2)S3(=O)=O)c3c1	DNDI0003369451	MAD1690		Synthesised	>64	4.19	1.59	0.24	>64	1									>64	>64										1.32	1.32	2.6	2.6	351.4	0	5	55.84	0.15	4
O=S1(c(cccc2)c2OCC(Cc3ccccc3)N1Cc4ccccc4)=O	DNDI0003370081	MAD1697		Synthesised	33.49	4.48	0.43	0.23	45.25	1			5						>64	>64										0.03	0.03	4.05	4.05	379.5	0	4	46.61	0.13	4
COc1c(S(=O)(N(Cc2ccc(F)cc2)Cc3ccc(F)cc3)=O)cc(CN4CCOCC4)cc1	DNDI0003370082	PJK658	24	Synthesised	0.52	6.28	2.91	0.25	>64	123	3200	49	4.3						1.56	>64									0.74	0.81	2.15	3.37	3.41	502.6	0	6	59.08	0.24	9
COc1c(S(=O)(N(Cc2ccccn2)Cc3ccc(F)cc3)=O)cc(C#N)cc1	DNDI0003370083	PJK663		Synthesised	3.19	5.5	2.88	0.27	>64	20	1840	694	3.6						28.95	>64									11.9	0.09	0.09	2.62	2.62	411.5	0	6	83.29	0.26	8
COc1c(S(=O)(N(Cc2ccccn2)Cc3ccc(F)cc3)=O)cccn1	DNDI0003370084	PJK669		Synthesised	7.39	5.13	2.95	0.27	>64	9	4620	696	3.5						33.58	>64									27.4	0.93	0.93	2.18	2.18	387.4	0	6	72.39	0.24	7
COc1cc(S(=O)(N(c2ccc(F)cn2)Cc3ccc(F)cc3)=O)c(OC)cc1	DNDI0003370085	PJK670		Synthesised	41.9	4.38	1.57	0.21	>64	2	1992	230	3.5			33.02			5.17	>64		15	16.36						7.1	-0.03	-0.03	2.8	2.8	420.4	0	6	68.73	0.23	7
O=C1C(Cc2ccccc2)N(Cc3ccccc3)S(=O)(=O)c4c1cccc4	DNDI0003370098	MAD1705		Synthesised	11.7	4.93	1.4	0.26	>64	5	1063	141	3.6			>64			9.38	30.76		>64	>64						4.11	-0.53	-0.53	3.53	3.53	377.5	0	4	54.45	0.13	4
COc1c(S(=O)(N(Cc2ccc(F)cc2)Cc3ccc(F)cc3)=O)cc(CN4CCCC4)cc1	DNDI0003370114	PJK671		Synthesised	2.92	5.53	1.75	0.23	8	3	144	62	4.4			0.72			3.27	6.87		13.85	3.25						0.64	0.5	2.21	3.78	3.47	486.6	0	5	49.85	0.24	9
COc1cc(S(=O)(N(Cc2ncccn2)Cc3ncccn3)=O)c(OC)cc1	DNDI0003370115	PJK676		Synthesised	>64	4.19	2.09	0.21	>64	1	67	17	1.3			>64			61.41	>64		>64	>64						25.06	1.14	1.14	2.11	2.11	401.4	0	9	107.4	0.27	8
Clc1ccc(OC)c(S(N(C(C(N)=O)Cc2ccccc2)Cc3ccccc3)(=O)=O)c1	DNDI0003370116	MAD1711		Synthesised	4.73	5.33	1.89	0.24	32	7	801	752	4.2			30.35			5.3	9.62		37.52	39.02						5.17	0.75	0.75	3.43	3.43	459	1	6	89.7	0.27	9
COc1c(S(=O)(N(Cc2ncccn2)Cc3ccc(F)cc3)=O)cc(OC)cc1	DNDI0003370419	PJK695		Synthesised	13.79	4.86	2.13	0.23	>64	5	844	115	3.4						38.83	>64		19.08	>64						25.06	0.39	0.39	2.73	2.73	417.5	0	7	81.62	0.26	8
COc1c(S(=O)(N(Cc2c(C)nc(C)o2)Cc3ccc(F)cc3)=O)cc(OC)cc1	DNDI0003370420	PJK707	SI51	Synthesised	2.34	5.63	2.41	0.26	>64	27	2276	376	3.8						24.93	>64		1.24	>64						46.37	0.59	0.59	3.22	3.22	434.5	0	7	81.87	0.25	8
COc1c(S(=O)(N(Cc2c(C)nc(C)o2)Cc3ccc(F)cc3)=O)cc(C#N)cc1	DNDI0003370421	PJK708		Synthesised	7.89	5.1	1.91	0.24	>64	8	721	392	3.7						26.08	49.15		1.91	>64						14.75	0.09	0.09	3.19	3.19	429.5	0	7	96.43	0.25	8
COc1c(S(=O)(N2CCC(c3ccccc3)CC2)=O)cc(OC)cc1	DNDI0003370422	PJK712		Synthesised	>64	4.19	1.48	0.23	>64	1	664	1609	4.2						16.94	>64		4.56	63.89						6.45	1.48	1.48	2.71	2.71	361.5	0	5	55.84	0.19	5
O=S(N(Cc1ccccc1)CC(c2ccc(F)cc2)=O)(c3c(OC)ccc(Cl)c3)=O	DNDI0003371155	MAD1704		Synthesised	41.78	4.38	0.77	0.2	45.25	1	1900		4.8						>64	>64									0.24	-0.29	-0.29	3.61	3.61	447.9	0	5	63.68	0.25	8
O=S(c1cc(Cl)ccc1O)(N(Cc2ccccc2)C(c3ccc(F)cc3)=C)=O	DNDI0003371156	MAD1716		Synthesised	7.44	5.13	1	0.26	8	1			5.1						2.26	3.61									1.41	0.33	0.33	4.13	4.13	417.9	1	4	57.61	0.2	6
O=S(N(Cc1ccccc1)CC(c2ccc(F)cc2)=O)(c3cc(F)ccc3F)=O	DNDI0003371157	MAD1738		Synthesised	>64	4.19	0.69	0.2	>64	1	1380	756	4.6						>64	>64									0.83	-0.59	-0.59	3.5	3.5	419.4	0	4	54.45	0.23	7
Fc1ccc(F)cc1S(N(Cc2ccc(F)cc2)Cc3ccc(F)cc3)(=O)=O	DNDI0003371158	MAD1746		Synthesised	>64	4.19	0.52	0.21	>64	1									>64	>64										-0.78	-0.78	3.67	3.67	409.4	0	3	37.38	0.2	6
O=S(N(Cc1ccccc1)CC(O)c2ccc(F)cc2)(c3cc(F)ccc3F)=O	DNDI0003371159	MAD1747		Synthesised	33.08	4.48	1.26	0.22	>64	2									7.27	18.67										0	0	3.22	3.22	421.4	1	4	57.61	0.23	7
O=S1(c(cc(F)cc2)c2OC(c3ccc(F)cc3)CN1Cc4ccccc4)=O	DNDI0003371160	MAD1749		Synthesised	20.24	4.69	0.8	0.23	>64	3	323	398	4.9						7.97	>64										-0.53	-0.53	3.89	3.89	401.4	0	4	46.61	0.1	3
O=S(c1cc(F)ccc1OCCN(C)C)(N(Cc2ccc(F)cc2)Cc3ccc(F)cc3)=O	DNDI0003371161	MAD1750		Synthesised	2.19	5.66	1.97	0.24	8	4	845	214	4.9						2.17	7.62									0.06	0.56	2.82	3.69	2.85	478.5	0	5	49.85	0.29	10
CNc1c(S(=O)(N(Cc2ccc(F)cc2)Cc3ccc(F)cc3)=O)cccn1	DNDI0003371162	PJK716		Synthesised	3.54	5.45	2.74	0.27	>64	18	984	401	4.5						14.48	>64		>64	16.92						1.61	0.04	2.13	2.71	2.31	403.5	1	5	62.3	0.23	7
Nc1c(S(=O)(N(Cc2ccc(F)cc2)Cc3ccc(F)cc3)=O)cccn1	DNDI0003371163	PJK717		Synthesised	>64	4.19	1.62	0.22	>64	1	447	164	4.2						41.98	>64		52.21	>64						2.18	0.11	2.06	2.58	2.23	389.4	1	5	76.29	0.21	6
O=S(c1c(OC)ccc(S(C)(=O)=O)c1)(N(Cc2ccc(F)cc2)Cc3ccc(F)cc3)=O	DNDI0003371164	PJK718	26	Synthesised	1.28	5.89	2.97	0.26	>64	50		296	3.9						22	>64		24.28	41.66						2.57	0.2	0.2	2.92	2.92	481.5	0	6	80.75	0.24	8
O=C1NC=CC=C1S(=O)(N(Cc2ccc(F)cc2)Cc3ccc(F)cc3)=O	DNDI0003371165	PJK720		Synthesised	>64	4.19	1.54	0.22	>64	1	218	44	3.8						42.3	>64		23.15	>64						23.62	0.33	0.33	2.66	2.66	390.4	1	5	70.24	0.21	6
[2H]C([2H])([2H])Oc1c(S(=O)(N(Cc2ccc(F)cc2)Cc3ccc(F)cc3)=O)cccn1	DNDI0003371166	PJK721		Synthesised	32.07	4.49	1.63	0.2	>64	2	123	14	3.5						20.82	>64		41.78	18.94						4.95	0.04	0.04	2.86	2.86	407.5	0	5	59.5	0.23	7
O=S(c1c(OC(F)F)nccc1)(N(Cc2ccc(F)cc2)Cc3ccc(F)cc3)=O	DNDI0003371167	PJK722		Synthesised	9.4	5.03	1.86	0.23	>64	7	3070	751	4.8						31.25	>64		>64	>64						0.98	-0.51	-0.51	3.17	3.17	440.4	0	5	59.5	0.25	8
O=C1C(S(=O)(N(Cc2ccc(F)cc2)Cc3ccc(F)cc3)=O)=CC=CN1C	DNDI0003371168	PJK723	31	Synthesised	20.53	4.69	1.68	0.23	>64	3	629	222	3.8						24.47	>64		62.46	>64						18.3	0.22	0.22	3.01	3.01	404.4	0	5	59.38	0.2	6
COc1c(S(=O)(N(Cc2ccc(F)cc2)Cc3ccc(F)cc3)=O)cccn1	DNDI0003371169	PJK726		Synthesised	12.96	4.89	2.02	0.24	>64	5	1171	334	4.4						44.21	>64		>64	>64						2.56	0.05	0.05	2.86	2.86	404.4	0	5	59.5	0.23	7
COc1c(S(=O)(N(c2ccc(F)cc2)Cc3ccc(F)cc3)=O)cc(OC)cc1	DNDI0003371170	PJK728	33	Synthesised	11.34	4.95	1.6	0.24	>64	6	703	417	4.3						15.12	>64		30.74	23.27						1.83	-0.22	-0.22	3.35	3.35	419.4	0	5	55.84	0.23	7
N#Cc1ccc(OC)c(S(=O)(N(Cc2ccc(F)cc2)Cc3ccc(C#N)cc3)=O)c1	DNDI0003371171	PJK732		Synthesised	33.21	4.48	1.41	0.2	>64	2									30.36	>64		>64	>64							-0.54	-0.54	3.07	3.07	435.5	0	6	94.19	0.27	9
N#Cc1ccc(OC)c(S(=O)(N(Cc2ccc(F)cc2)Cc3ccc(OC)cc3)=O)c1	DNDI0003371172	PJK733		Synthesised	2.92	5.53	2.5	0.25	>64	22									13.16	>64		22.59	35.3							-0.28	-0.28	3.03	3.03	440.5	0	6	79.63	0.27	9
COc1c(S(=O)(N(Cc2ccc(F)cc2)Cc3ccc(F)cc3)=O)cc(C(N4CCN(C)CC4)=O)cc1	DNDI0003371173	PJK737		Synthesised	0.54	6.27	3.53	0.24	32	59	2240	585	4.7						11.06	25.81		4.16	49.45						3.23	1.45	2.97	2.74	2.43	529.6	0	7	70.16	0.22	9
COc1c(S(=O)(N(Cc2ccc(F)cc2)Cc3ccc(F)cc3)=O)cc(C(NC4COC4)=O)cc1	DNDI0003371174	PJK738	23	Synthesised	0.79	6.1	3.31	0.24	>64	81	395	178	4						38.52	>64		>64	>64						4.92	-0.12	-0.12	2.8	2.8	502.5	1	7	84.94	0.26	10
COc1c(S(=O)(N(Cc2ccc(F)cc2)Cc3ccc(F)cc3)=O)cc(C(N(C)CCO)=O)cc1	DNDI0003371175	PJK739		Synthesised	2.08	5.68	3.33	0.23	>64	31	605	498	3.8						25.33	>64		60.16	57.65						11.17	1.22	1.22	2.36	2.36	504.5	1	7	87.15	0.3	11
COc1c(S(=O)(N(Cc2ccc(F)cc2)Cc3ccc(F)cc3)=O)cc(C(NCCO)=O)cc1	DNDI0003371176	PJK740		Synthesised	2.53	5.6	3.14	0.23	>64	25	410	131	3.8						44.29	>64		>64	>64						5.78	0.41	0.41	2.46	2.46	490.5	2	7	95.94	0.31	11
COc1c(S(=O)(N(Cc2ccc(F)cc2)Cc3ccc(F)cc3)=O)cc(C(NCCOC)=O)cc1	DNDI0003371177	PJK741		Synthesised	1.03	5.99	3.17	0.24	>64	62	1671	407	4.1						40.41	>64		>64	54.11						8.63	0.12	0.12	2.81	2.81	504.5	1	7	84.94	0.32	12
O=C(N1CCOCC1)c2cc(S(=O)(N(Cc3ccc(F)cc3)Cc4ccc(F)cc4)=O)c(OC)cc2	DNDI0003371178	PJK743		Synthesised	1.02	5.99	3.31	0.23	>64	63	984	997	4						50.71	>64		46.92	44.48						9.35	0.44	0.44	2.68	2.68	516.6	0	7	76.15	0.23	9
O=S(c1cc(F)ccc1OCCN(C)C)(N(Cc2ccc(F)cc2)Cc3ccc(OC)cc3)=O	DNDI0003378485	MAD1758		Synthesised	3.24	5.49	1.98	0.23	8	2	1080	183	5						6.96	6.43		1.95	9.1						0.29	1.02	3.21	3.51	2.7	490.6	0	6	59.08	0.31	11
O=S(N(Cc1ccccc1)C(c2ccc(F)cc2)CO)(c3c(F)ccc(F)c3)=O	DNDI0003378486	MAD1768		Synthesised	35.54	4.45	1.08	0.21	>64	2									13.65	21.21		1.67	24.39							-0.11	-0.11	3.36	3.36	421.4	1	4	57.61	0.23	7
COc1c(S(=O)(N(C2CCOCC2)Cc3ccc(F)cc3)=O)cc(C#N)cc1	DNDI0003388084	PJK744	43	Synthesised	>64	4.19	1.58	0.21	>64	1	253	194	3.4						53.09	>64		44.15	>64						12.7	0.6	0.6	2.62	2.62	404.5	0	6	79.63	0.23	7
Cc1noc(c2cc(S(=O)(N(Cc3ccc(F)cc3)Cc4ccc(F)cc4)=O)c(OC)cc2)n1	DNDI0003388085	PJK742		Synthesised	5.68	5.25	1.52	0.22	>64	11	739	177	4.6						>64	>64		38.61	>64						1.74	-0.45	-0.45	3.73	3.73	485.5	0	7	85.53	0.22	8
COc1c(S(=O)(N(C2CCOCC2)Cc3ccc(F)cc3)=O)cc(OC)cc1	DNDI0003388086	PJK749		Synthesised	>64	4.19	1.56	0.21	>64	1	599	49	3.7						45	>64		>64	>64						31.92	1.17	1.17	2.63	2.63	409.5	0	6	65.07	0.23	7
COc1c(S(=O)(N(Cc2ccc(OC)cc2)Cc3ccc(F)cc3)=O)cc(OC)cc1	DNDI0003388087	PJK750		Synthesised	11.31	4.95	1.9	0.22	>64	6	19	80	3.5						9.04	5.42		2.44	33.19							0.28	0.28	3.04	3.04	445.5	0	6	65.07	0.27	9
COc1c(S(=O)(N(Cc2ccc(C#N)cc2)Cc3ccc(F)cc3)=O)cc(OC)cc1	DNDI0003388088	PJK753		Synthesised	18.56	4.73	1.63	0.21	>64	3		87	4.1						19.04	>64		51.87	36.18						3.57	-0.23	-0.23	3.1	3.1	440.5	0	6	79.63	0.27	9
Clc1ccc(OC)c(S(N(C(c2ccc(F)cc2)CO)Cc3ccccc3)(=O)=O)c1	DNDI0003388149	MAD1713		Synthesised	1.69	5.77	2.29	0.27	>64	38	38	18							15.78	21.56		1.25	15.67						3.4	0.56	0.56	3.48	3.48	449.9	1	5	66.84	0.25	8
Fc1ccc(F)cc1S(N(Cc2ccc(F)cc2)Cc3ccc(OC)cc3)(=O)=O	DNDI0003388150	MAD1753		Synthesised	57.02	4.24	0.69	0.2	>64	1									54.43	>64		>64	>64							-0.58	-0.58	3.55	3.55	421.4	0	4	46.61	0.23	7
COc1c(S(N(Cc2ccc(F)cc2)Cc3ccc(F)cc3)(=O)=O)cc(CNC4COC4)cc1	DNDI0003389115	PJK754		Synthesised	1.79	5.75	2.65	0.24	>64	36	384	147	4						14.4	41.67		51.7	>64						3.42	-0.07	2.23	3.09	2.63	488.5	1	6	67.87	0.27	10
COc1c(S(N(Cc2ccc(F)cc2)Cc3ccc(F)cc3)(=O)=O)cc(CN4CCC(F)(F)CC4)cc1	DNDI0003389116	PJK755		Synthesised	3.18	5.5	1.32	0.21	45.25	14	1763	984	4.8						2.93	>64		18.2	>64						0.4	-0.09	2.07	4.18	3.91	536.6	0	5	49.85	0.22	9
CN(C)c1c(S(N(Cc2ccc(F)cc2)Cc3ccc(F)cc3)(=O)=O)cccn1	DNDI0003389117	PJK758		Synthesised	5.99	5.22	2.35	0.25	>64	11	903	728	4.6						12.61	42.72		16.73	56.71						1.18	0.16	2.27	2.87	2.51	417.5	0	5	53.51	0.23	7
O=S(c1c(OC)ccc(N2CCOCC2)c1)(N(Cc3ccc(F)cc3)Cc4ccc(F)cc4)=O	DNDI0003389118	PJK759	25	Synthesised	0.32	6.49	3.05	0.27	>64	200	488	82	4.3						7.91	>64		15.18	>64						2.55	-0.1	1.96	3.45	3.48	488.5	0	6	59.08	0.22	8
O=S(c1c(N2CCOCC2)nccc1)(N(Cc3ccc(F)cc3)Cc4ccc(F)cc4)=O	DNDI0003389119	PJK761		Synthesised	2.83	5.55	2.6	0.24	>64	23	738	823	4.5						15.08	>64		29.41	>64						3.63	0.1	1.6	2.95	3	459.5	0	6	62.74	0.2	7
Fc1ccc(OCC(c2ccc(F)cc2)N(Cc3ccccc3)S4(=O)=O)c4c1	DNDI0003389122	MAD1770		Synthesised	10.15	4.99	1.1	0.25	16	2			4.9						>64	>64		12.12	>64							-0.53	-0.53	3.89	3.89	401.4	0	4	46.61	0.1	3
c1ccc(cc1)CN(Cc2ccc(cc2)F)S(=O)(=O)c3cc(ccc3N(=O)=O)Cl	DNDI0003389123	MAD1772		Synthesised	>64	4.19	0.4	0.2	>64	1			5.1						26.42	>64		>64	>64							-0.42	-0.42	3.79	3.79	434.9	0	6	83.2	0.23	7
Oc1c(S(N(Cc2ccc(F)cc2)Cc3ccc(F)cc3)(=O)=O)cc(C#N)cc1	DNDI0003389125	PJK771	16	Synthesised	30.7	4.51	1.24	0.22	45.25	1	366	33	3.5						16.75	4		7.8	>64						13.23	-0.31	-0.31	3.27	3.27	414.4	1	5	81.4	0.23	7
O=C(N1CCOCC1)c2cc(S(=O)(N(C)Cc3ccc(F)cc3)=O)c(OC)cc2	DNDI0003389126	PJK772		Synthesised	57.02	4.24	2.77	0.2	>64	1	94	70	2.7						41.43	>64		>64	>64						16.63	2.29	2.29	1.48	1.48	422.5	0	7	76.15	0.23	7
O=C(N1CCOCC1)c2cc(S(=O)(N(CC(C)C)Cc3ccc(F)cc3)=O)c(OC)cc2	DNDI0003389127	PJK773	44	Synthesised	6.86	5.16	2.7	0.23	>64	9	355	543	3.6						39.13	>64		8.25	>64						17.69	1.57	1.57	2.46	2.46	464.5	0	7	76.15	0.26	9
O=C(N1CCOCC1)c2cc(S(=O)(N(Cc3ccccc3Cl)Cc4ccc(F)cc4)=O)c(OC)cc2	DNDI0003389128	PJK774		Synthesised	1.4	5.85	2.91	0.23	>64	46	1655	351	4.1						9.66	36.81		10.49	>64						9	0.6	0.6	2.95	2.95	533	0	7	76.15	0.23	9
COc1cc(S(=O)(N(Cc2ccnn2C)Cc3ccc(F)cc3)=O)c(OC)cc1	DNDI0003389129	PJK776	35	Synthesised	5.19	5.29	2.58	0.26	45.25	9	1089	207	3.5						21.09	>64		26.28	>64						35.6	0.99	0.99	2.71	2.71	419.5	0	7	73.66	0.26	8
O=S(N(Cc1ccccc1)CC(O)c2ccc(F)cc2)(c3c(OC)ccc(Cl)c3)=O	DNDI0003389316	MAD1781		Synthesised	11.98	4.92	1.58	0.23	>64	5	147	298	3.1						17.75	23.54		4.75	51.45						4	0.52	0.52	3.35	3.35	449.9	1	5	66.84	0.25	8
O=S(N(Cc1ccccc1)CC(O)c2ccc(F)cc2)(c3c(OC)cccc3)=O	DNDI0003389317	MAD1782		Synthesised	11.58	4.94	1.94	0.24	>64	6	1243	610	4.1						26.64	40.69		10.48	>64						11.81	0.86	0.86	3	3	415.5	1	5	66.84	0.26	8
O=S(c1cc(F)ccc1OCCNC)(N(Cc2ccc(F)cc2)Cc3ccc(F)cc3)=O	DNDI0003389318	MAD1787		Synthesised	2.38	5.62	2.34	0.25	8	3	84	46	5.3						5.11	4.22		7.25	6.84						0.43	-0.28	2.54	3.28	2.44	464.5	1	5	58.64	0.29	10
COc1c(S(=O)(N(Cc2c(OC)nc(OC)nc2)Cc3ccc(F)cc3)=O)cc(OC)cc1	DNDI0003389321	PJK790	34	Synthesised	53.81	4.27	1.74	0.18	>64	1	861	270	3.8						27.81	>64		>64	>64						15.19	0.57	0.57	2.52	2.52	477.5	0	9	100.1	0.29	10
N#Cc1c(S(N(Cc2ccccc2)Cc3ccccc3)(=O)=O)cccc1	DNDI0003389641	PJK798	13	Synthesised	11.31	4.95	1.67	0.27	>64	6		577	4.2						18.45	>64		1.28	>64						1.66	-0.2	-0.2	3.28	3.28	362.5	0	4	61.17	0.25	7
O=S(c1c(S(N(Cc2ccccc2)Cc3ccccc3)(=O)=O)cccc1)(C)=O	DNDI0003389642	PJK799	14	Synthesised	32	4.49	1.69	0.22	>64	2	502	248	4.1						24.33	>64		38.15	>64						6.25	1.04	1.04	2.81	2.81	415.5	0	5	71.52	0.23	7
O=C(N(Cc1ccc(F)cc1)Cc2ccc(F)cc2)c3c(OC)ccc(S(N4CCOCC4)(=O)=O)c3	DNDI0003389643	PJK808		Synthesised	16.95	4.77	1.98	0.19	>64	4	610	717	3.9						16.56	>64		>64	>64						4.14	0.64	0.64	2.79	2.79	516.6	0	7	76.15	0.23	9
COc1c(S(N(Cc2ccc(F)cc2)Cc3cnc(C(F)(F)F)cc3)(=O)=O)cc(C(N4CCOCC4)=O)cc1	DNDI0003389644	PJK810	46	Synthesised	1.74	5.76	2.97	0.21	>64	37	163	190	3.7						3.39	>64		36.87	>64		3.79	3.32	95.91	36.17	10.04	0.18	0.18	2.79	2.79	567.6	0	8	89.04	0.24	10
COc1c(S(N(Cc2ccc(F)cc2)Cc3ccc(F)cc3)(=O)=O)cc(N4CCN(C)CC4)cc1	DNDI0003389645	PJK811		Synthesised	0.4	6.4	2.93	0.26	8	20	212	152	4.4						2.8	28.68		8.45	26.84						0.71	0.98	2.76	3.47	3.38	501.6	0	6	53.09	0.21	8
O=S(c1ncccc1)(N(Cc2ccccc2)Cc3ccccc3)=O	DNDI0003389646	PJK815		Synthesised	16.13	4.79	1.99	0.28	>64	4	449	218	4						27.66	>64		33.78	>64						9.55	1.17	1.17	2.81	2.81	338.4	0	4	50.27	0.23	6
Fc1ccc(CN(Cc2ccc(F)cc2)S(c3c(OC(F)F)ccc(N4CCOCC4)c3)(=O)=O)cc1	DNDI0003389647	PJK817		Synthesised	0.5	6.3	2.55	0.25	45.25	91	462	153	4.8						5.62	>64		37.55	>64						0.12	-0.57	1.85	3.76	3.72	524.5	0	6	59.08	0.23	9
C[N+](C)(CCOc1ccc(cc1S(=O)(=O)N(Cc2ccc(cc2)OC)Cc3ccc(cc3)F)F)CC(=O)O	DNDI0003389931	MAD1785		Synthesised	>64	4.19	1.01	0.15	>64	1	17	14	3.8						13.09	>64		61.06	>64						0.36	1.09	4.02	3.18	0.64	549.6	1	8	93.14	0.32	13
O=S(N(Cc1ccccc1)CC(N)c2ccc(F)cc2)(c3c(OC)ccc(Cl)c3)=O	DNDI0003389932	MAD1789		Synthesised	6.39	5.19	2.15	0.24	32	5	239	34	4.3						4.64	13.95		>64	19.46						0.59	0.86	2.82	3.05	2.72	448.9	1	5	72.63	0.25	8
O=S(N(Cc1ccccc1)C(CO)CO)(c2c(OC)ccc(Cl)c2)=O	DNDI0003389933	MAD1798		Synthesised	57.02	4.24	2.36	0.24	>64	1	253	109	3.2						14.26	>64		>64	>64						13.17	3.32	3.32	1.89	1.89	385.9	2	6	87.07	0.31	8
O=C(N1CCOCC1)c2cc(S(=O)(N(CC)Cc3ccc(F)cc3)=O)c(OC)cc2	DNDI0003392124	PJK823		Synthesised	20.67	4.68	2.75	0.22	>64	3	116	142	2.7		>64				36.01	>64	>64	>64	>64						15.54	1.96	1.96	1.94	1.94	436.5	0	7	76.15	0.25	8
O=C(N1CCOCC1)c2cc(S(=O)(N(CCOC)Cc3ccc(F)cc3)=O)c(OC)cc2	DNDI0003392125	PJK824	42	Synthesised	22.47	4.65	3.02	0.2	>64	3	60	28	2.9						>64	22.71									15.4	2.47	2.47	1.63	1.63	466.5	0	8	85.38	0.29	10
O=C(N1CCOCC1)c2cc(S(=O)(N(CCOC)Cc3ccccc3)=O)c(OC)cc2	DNDI0003392126	PJK838		Synthesised	43.97	4.36	2.85	0.2	>64	1									>64	>64										3.01	3.01	1.51	1.51	448.5	0	8	85.38	0.3	10
O=C(N1CCNCC1)c2cc(S(=O)(N(CCOC)Cc3ccccc3)=O)c(OC)cc2	DNDI0003392127	PJK839		Synthesised	35.92	4.44	3.1	0.2	>64	2									13.39	>64										3.76	2.85	1.35	0.75	447.5	1	8	88.18	0.3	10
O=C(NC)c1cc(S(=O)(N(CCOC)Cc2ccccc2)=O)c(OC)cc1	DNDI0003392128	PJK840		Synthesised	28.1	4.55	2.99	0.24	>64	2	393	23	2.7						>64	>64									7.61	3	3	1.56	1.56	392.5	1	7	84.94	0.36	10
O=C(NC1COC1)c2cc(S(=O)(N(CCOC)Cc3ccccc3)=O)c(OC)cc2	DNDI0003392129	PJK841		Synthesised	15.45	4.81	3.18	0.22	>64	4	114	39	2.7						>64	>64									4.72	2.63	2.63	1.64	1.64	434.5	1	8	94.17	0.34	11
O=S(c1c(OC(F)(F)F)cccc1)(N(CCOC)Cc2ccccc2)=O	DNDI0003392130	PJK842	40	Synthesised	8.27	5.08	2	0.27	>64	8	222	194	3.8		31.17				17.77	>64	>64	45.11	>64						5.26	1.44	1.44	3.08	3.08	389.4	0	5	55.84	0.33	9
O=S1(c(cc(S(N)(=O)=O)c(Cl)c2)c2NCN1Cc3ccccc3)=O	DNDI0003392143	MAD1801		Synthesised	57.02	4.24	2.69	0.25	>64	1	164	21	2.3		>64				27.24	>64	>64	>64	>64						2.83	2.28	3.32	1.55	1.85	387.9	2	7	109.6	0.12	3
O=S1(c(cc(S(NCc2ccccc2)(=O)=O)c(Cl)c3)c3NCN1Cc4ccccc4)=O	DNDI0003392144	MAD1804		Synthesised	>64	4.19	1.21	0.19	>64	1	261	82	3.7		>64				35.7	>64	53.24	60.19	>64						1.61	1.45	2.6	2.99	2.99	478	2	7	95.58	0.18	6
Nc1cc(Cl)c(S(N)(=O)=O)cc1S(=O)(N(Cc2ccccc2)Cc3ccccc3)=O	DNDI0003392145	MAD1814_F3		Synthesised	35.33	4.45	1.95	0.21	50.8	1		253	3.4		31.21				17.69	43.37	60.61	>64	>64						3.37	1.55	2.93	2.51	2.53	466	2	7	123.6	0.22	7
O=S(N(Cc1ccccc1)C2COC(=O)OC2)(c3c(OC)ccc(Cl)c3)=O	DNDI0003392146	MAD1826		Synthesised	16.95	4.77	2.23	0.25	>64	4	118	21	3.5		>64				16.99	59.12	>64	54.75	>64						13.16	1.26	1.26	2.54	2.54	411.9	0	7	82.14	0.21	6
O=S1(c(cc(S(N)(=O)=O)c(Cl)c2)c2NC(CCCC)N1Cc3ccccc3)=O	DNDI0003392147	MAD1827		Synthesised	7.3	5.14	2.38	0.26	>64	9	147	22	4		23.36				>64	>64	12.03	>64	>64						1.39	1.64	2.61	2.75	2.7	444	2	7	109.6	0.2	6
CCCCOc1c(S(=O)(NCc2ccccc2)=O)cc(C(N3CCOCC3)=O)cc1	DNDI0003407874	PJK900		Synthesised	>64	4.19	1.5	0.2	>64	1	274	160	3.1		>64				45.86	>64	>64	>64	>64						27.41	2.61	2.61	2.7	2.7	432.5	1	7	84.94	0.31	10
COc1c(S(=O)(N(CC(C)(C)C)Cc2ccccc2)=O)cc(C(N3CCOCC3)=O)cc1	DNDI0003407876	PJK904	45	Synthesised	1	6	3.31	0.26	>64	64	858	1145	3.8		27.51				16.73	>64	>64	>64	>64						21.7	1.47	1.47	2.69	2.69	460.6	0	7	76.15	0.26	9
O=S(c1c(OCC2OCCC2)ccc(C(N3CCOCC3)=O)c1)(NCc4ccccc4)=O	DNDI0003407877	PJK905		Synthesised	>64	4.19	2.11	0.18	>64	1	181	85	2.7		>64				31	>64	>64	>64	>64						14.71	2.7	2.7	2.09	2.09	460.5	1	8	94.17	0.26	9
O=S(NCc1ccccc1)(c2c(OC)ccc(S(=O)(N)=O)c2)=O	DNDI0003407892	MAD1830		Synthesised	>64	4.19	3.1	0.26	>64	1	23	20	1.1		>64				>64	>64	>64	>64	>64						0.61	3.41	3.41	1.09	1.09	356.4	2	7	115.6	0.25	6
COc1c(S(=O)(N(Cc2cnc(C(F)(F)F)cc2)C(C)c3ccc(F)cc3)=O)cc(C(N4CCOCC4)=O)cc1	DNDI0003407905	PJK917		Synthesised	2.36	5.63	2.51	0.2	>64	27	531	267	3.8		9.86				24.96	>64	>64	49.4	>64						18.13	-0.07	-0.07	3.11	3.11	581.6	0	8	89.04	0.23	10
COc1c(S(=O)(N(Cc2cnc(C(F)(F)F)cc2)CC(C)(C)C)=O)cc(C(N3CCOCC3)=O)cc1	DNDI0003407906	PJK919	48	Synthesised	45.25	4.34	1.52	0.17	>64	1	262	127	3.7		>64				35.55	>64	>64	>64	>64						15.69	0.71	0.71	2.82	2.82	529.6	0	8	89.04	0.26	10
COc1c(S(=O)(N(Cc2cnc(C(F)(F)F)nc2)Cc3ccccc3)=O)cc(C(N4CCOCC4)=O)cc1	DNDI0003425509	PJK902	47	Synthesised	4.35	5.36	2.54	0.2	>64	15	78	76	3.1		>64				7.07	>64	>64	>64	>64		11.3	6.22	88.3	15.8	15.16	0.55	0.55	2.82	2.82	550.5	0	9	101.9	0.24	10
O=S(N(Cc1ccccc1)Cc2ccccc2)(c3c(OC)cc(NCN(COCCOC)S4(=O)=O)c4c3)=O	DNDI0003425511	MAD1855	29	Synthesised	0.65	6.18	4.03	0.23	>64	98	976	460	4		14.77				61.68	>64	40.24	>64	51.98						0.92	1.24	3.03	2.15	2.86	561.7	1	10	114.5	0.29	12
O=S(N(Cc1ccccc1)Cc2ccccc2)(c3c(Cl)cc(NCNS4(=O)=O)c4c3)=O	DNDI0003425512	MAD1856		Synthesised	1.28	5.89	3.29	0.27	32	25		63	4.2		24.94				9.14	24.97	52.41	29.53	>64						0.04	1.02	2.86	2.61	2.89	478	2	7	95.58	0.18	6
O=S(N(Cc1ccccc1)Cc2ccccc2)(c3c(OC)cc(NCNS4(=O)=O)c4c3)=O	DNDI0003425513	MAD1857		Synthesised	2.53	5.6	3.43	0.24	>64	25	249	100	3.6		48.31				9.44	22.91	>64	21.91	>64						0.38	1.24	3.08	2.17	2.39	473.6	2	8	104.8	0.2	7
O=S(N(Cc1ccccc1)COCCOC)(c2c(OC)ccc(OC)c2)=O	DNDI0003425514	MAD1864		Synthesised	6.11	5.21	3.3	0.27	>64	10			3.4		>64				>64	>64	>64	>64	>64						12.77	2.44	2.44	1.91	1.91	395.5	0	7	74.3	0.39	11
O=S(c1cc(S(=O)(N(Cc2ccccc2)CC(C)(C)C)=O)c(OC)cc1)(C)=O	DNDI0003425524	PJK943	SI52	Synthesised	2.69	5.57	2.69	0.28	>64	24	1103	1050	3.6		47.73				28.65	>64	>64	57.24	>64						14.11	1.12	1.12	2.88	2.88	425.6	0	6	80.75	0.28	8
O=S(c1c(OC)ccc(C#N)c1)(N(Cc2cnc(C(F)(F)F)nc2)Cc3ccccc3)=O	DNDI0003425527	PJK976	49	Synthesised	3.9	5.41	1.94	0.24	>64	16	100	80	3.8		61.15				28.42	>64	>64	>64	>64						29.37	-0.2	-0.2	3.47	3.47	462.5	0	7	96.18	0.26	9
O=S(C1=CC(S(=O)(N(CC2=CC=CC=C2)CC3=CC(C(F)(F)F)=NN3C)=O)=C(C=C1)OC)(C)=O	DNDI0003578374	PJK1020		Synthesised	13.12	4.88	1.92	0.2	>64	5	182	60	3.5		>64				>64	>64	>64	>64	>64						7.6	0.58	0.58	2.96	2.96	514.5	0	7	93.64	0.25	9
O=S(c1c(OC)ccc(C#N)c1)(N(Cc2ccc(C(F)(F)F)nc2)Cc3cnc(C(F)(F)F)cc3)=O	DNDI0003578377	PJK1031	50	Synthesised	38.06	4.42	1.08	0.17	>64	2	64	17	3.9		>64				61.68	>64	>64	>64	>64						3.45	0.07	0.07	3.34	3.34	530.5	0	7	96.18	0.26	10
O=S1(c(cccc2)c2[C@H](O)[C@@H](Cc3ccccc3)N1Cc4ccccc4)=O	DNDI0003578378	MAD1869_F1		Synthesised	8.88	5.05	1.58	0.26	>64	7			4.2		19.53				7.67	>64	39.67	>64	63.9							0.52	0.52	3.47	3.47	379.5	1	4	57.61	0.13	4
O=S1(c(cccc2)c2[C@H](O)[C@H](Cc3ccccc3)N1Cc4ccccc4)=O	DNDI0003578379	MAD1869_F2		Synthesised	13.51	4.87	1.4	0.25	>64	5			3.9		12.14				6.7	29.67	39.4	27.04	>64							0.52	0.52	3.47	3.47	379.5	1	4	57.61	0.13	4
O=S(N(CCOC)Cc1ccccc1)(c2c(OC)ccc(Cl)c2S(C)=O)=O	DNDI0003578380	MAD1874		Synthesised	26.68	4.57	2.16	0.24	>64	2	286	85	2.9		>64				>64	>64	>64	>64	>64						17.6	2.4	2.4	2.41	2.41	432	0	6	72.91	0.32	9
O=S(N(CCOC)Cc1ccccc1)(c2c(OC)ccc(Cl)c2S(=O)(C)=O)=O	DNDI0003578381	MAD1879		Synthesised	50.8	4.29	2.18	0.21	>64	1	176	51	2.6		>64				>64	>64	>64	>64	>64						14.64	2.12	2.12	2.11	2.11	448	0	7	89.98	0.31	9
O=S(N(Cc1ccccc1)Cc2ccccc2)(c3c(OC)ccc(S(C)=O)c3)=O	DNDI0003578382	MAD1883	28	Synthesised	0.59	6.23	3.23	0.3	>64	109	397	125	3.6		11.52				16.89	21.26	>64	>64	>64						13.99	0.95	0.95	3	3	429.6	0	5	63.68	0.26	8
Clc1ccc(OCCN(Cc2ccccc2)S3(=O)=O)c3c1S(C)=O	DNDI0003578383	MAD1884		Synthesised	47.94	4.32	1.55	0.25	>64	1	423	33	3		>64				29.28	>64	>64	>64	>64						21.96	2	2	2.77	2.77	385.9	0	5	63.68	0.12	3
O=S(N(Cc1ccc(F)cc1)CCC)(c2c(OC)ccc(S(C)=O)c2)=O	DNDI0003578384	MAD1889		Synthesised	10.99	4.96	2.2	0.27	>64	6	437	67	3.1		>64				38.51	>64	>64	>64	>64						18.62	1.45	1.45	2.75	2.75	399.5	0	5	63.68	0.3	8
O=S(N(Cc1ccccc1)Cc2ccccc2)(c3c(OC)ccc(S(=O)(N)=O)c3)=O	DNDI0003578385	MAD1834	27	Synthesised	0.56	6.25	3.88	0.29	>64	113	366	58	3.5		5.75				4.66	13.28	>64	22.25	>64						3.76	1.7	1.7	2.36	2.36	446.5	1	7	106.8	0.25	8
